# Supplementary material for: Crenigacestat (LY3039478) inhibits osteogenic differentiation of human valve interstitial cells from patients with aortic valve calcification in vitro
Source: Frontiers journal article supplement (doi:10.3389/fcvm.2022.969096), 2022-09-29

Crenigacestat (LY3039478) inhibits osteogenic differentiation of human valve interstitial cells from patients with aortic valve calcification in vitro

Supplementary file 1

Results of MTT-test of cytotoxicity effect of crenigacestat and CB-103 on HEK293 cells

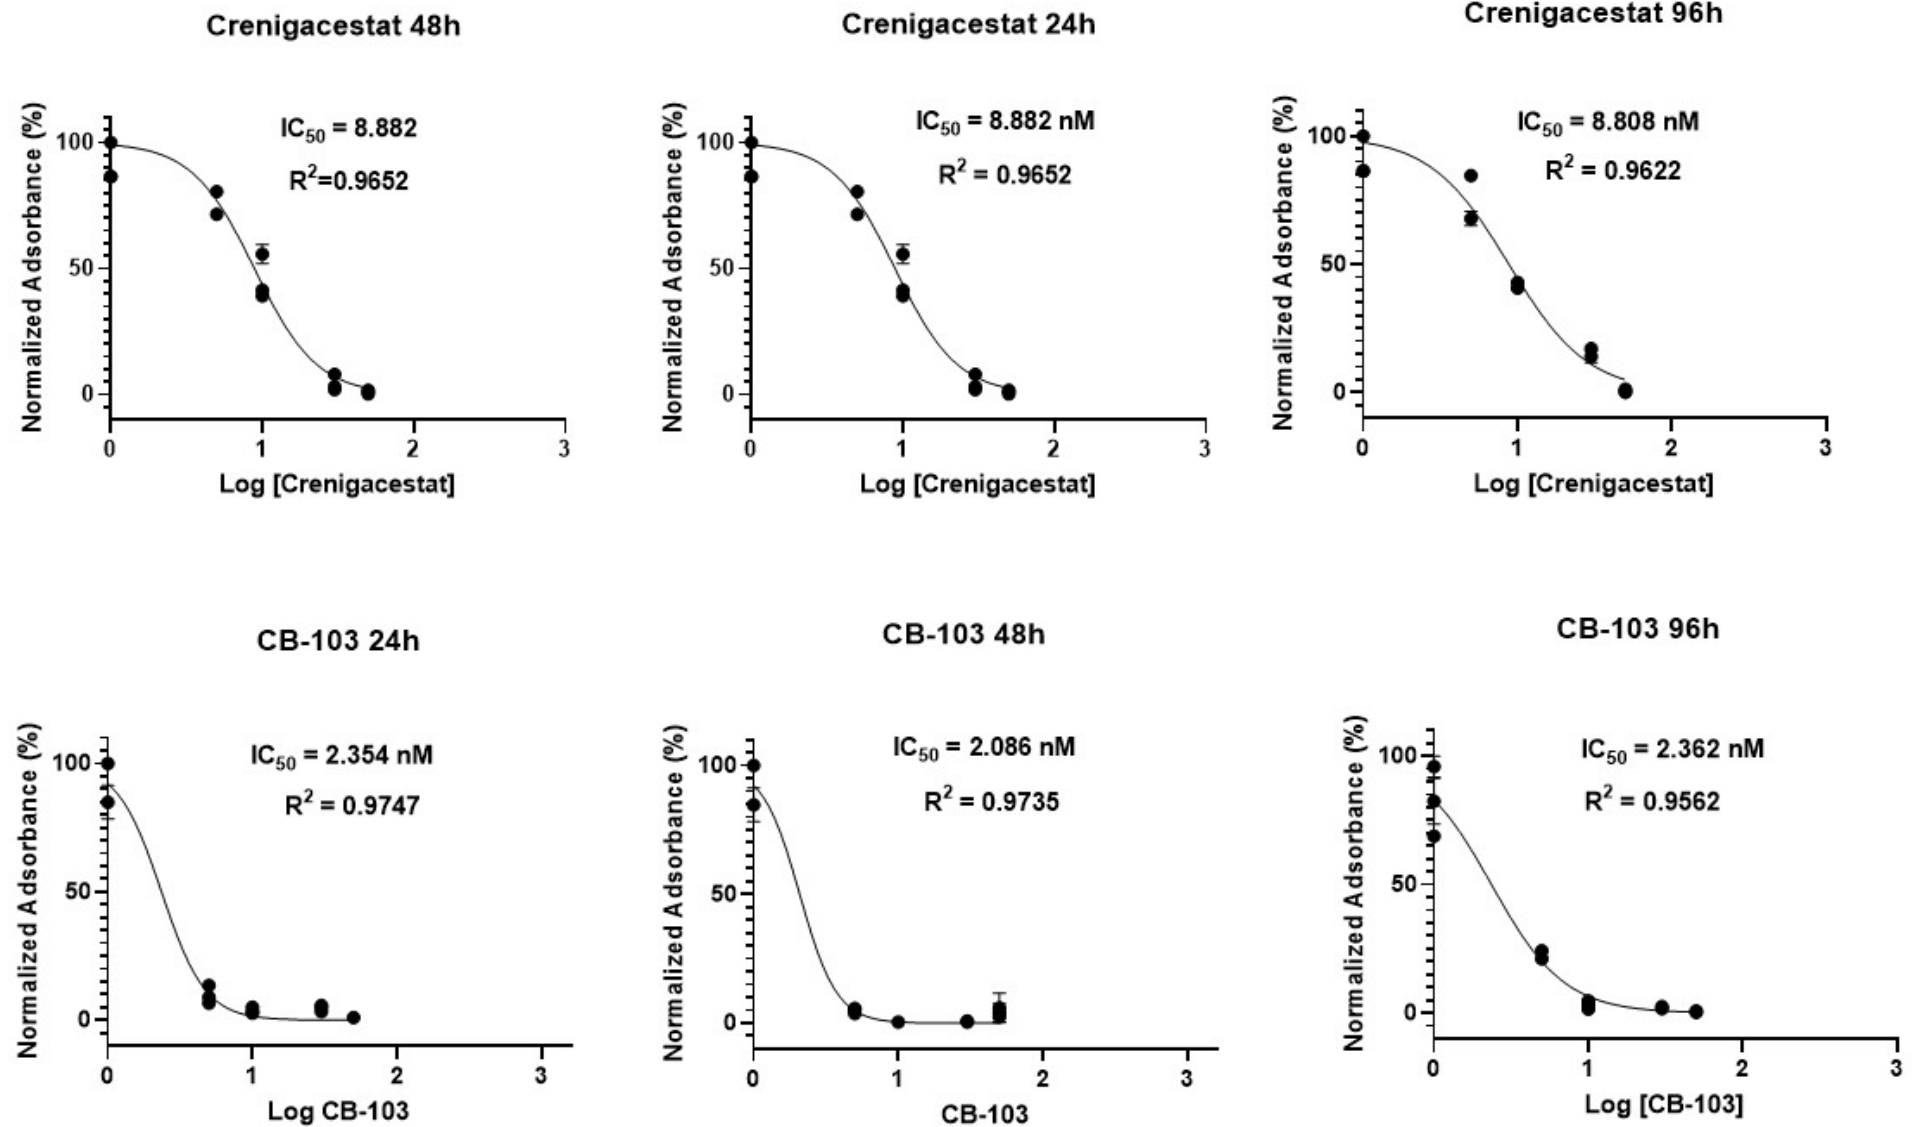

Supplement: Data_Sheet_1.PDF [file Data_Sheet_1.PDF]
